# Supplementary material for: The influence of a S-to-S bridge in diiron dithiolate models on the oxidation reaction: a mimic of the Hairox state of [FeFe]-hydrogenases
Source: Royal Society of Chemistry journal article supplement (doi:10.1039/c4cc03583f), 2014-01-01
Supplement: c4cc03583f1.pdf [file c4cc03583f1.pdf]

## Supporting Information

### The influence of S-to-S bridge in diiron dithiolate models on the oxidation reaction: A mimic of the H<sub>ox</sub><sup>air</sup> state of [FeFe]-hydrogenases

Dehua Zheng,<sup>a</sup> Mei Wang,<sup>\*a</sup> Lin Chen,<sup>a</sup> Ning Wang,<sup>a,b</sup> Minglun Cheng<sup>a</sup> and Licheng Sun<sup>a,c</sup>

<sup>a</sup>State Key Laboratory of Fine Chemicals, DUT-KTH Joint Education and Research Centre on Molecular Devices, Dalian University of Technology (DUT), Dalian 116024, China.

E-mail: [symbueno@dlut.edu.cn](mailto:symbueno@dlut.edu.cn)

<sup>b</sup>School of Chemistry and Chemical Engineering, Henan University of Technology, Zhengzhou 450001, China

<sup>c</sup>Department of Chemistry, KTH Royal Institute of Technology, Stockholm 10044, Sweden

## Experimental Section

### Materials and instruments

**Materials.** Preparation of ( $\mu$ -cpdt)Fe<sub>2</sub>(CO)<sub>6</sub>, **1** and **2** was carried out under dry oxygen-free dinitrogen with standard Schlenk techniques. Solvents were dried and distilled prior to use according to the standard methods. The reagents PMe<sub>3</sub> and Cp<sub>2</sub>Co were purchased from Aldrich and LiB(H)Et<sub>3</sub> from Acros. The other reagents such as cyclopentanone, Fe(CO)<sub>5</sub>, FcBF<sub>4</sub>, FcPF<sub>6</sub>, and Cp<sub>2</sub>Fe were purchased from local companies. All reagents were used as received. Compounds *cis*-2,5-dibromocyclopentanone,<sup>S1</sup> Fe<sub>2</sub>(SLi)<sub>2</sub>(CO)<sub>6</sub>,<sup>S2</sup> and FcBAr<sup>F</sup><sub>4</sub> were synthesized according to the literature procedures.<sup>S3,S4</sup>

**Instruments.** Infrared spectra were recorded with a JASCO FT/IR 430 spectrophotometer. <sup>1</sup>H and <sup>31</sup>P NMR spectra were collected with a varian INOVA 400 NMR spectrometer. Mass spectra were recorded on a HP1100LC/MSD. Elemental analyses were performed with a Thermoquest-Flash EA 1112 elemental analyzer.

## Synthesis

**Synthesis of  $(\mu\text{-cpdt})\text{Fe}_2(\text{CO})_6$**  (cpdt = cyclopentanone-2,5-dithiolate). Compound *cis*-2,5-dibromocyclopentanone (0.72 g, 3.0 mmol) was added to a freshly prepared  $\text{Fe}_2(\text{SLi})_2(\text{CO})_6$  (~3 mmol) in THF (30 mL) at  $-78\text{ }^\circ\text{C}$  with stirring under the protection of nitrogen. The color of the solution immediately turned from dark green to red. The mixture was stirred for 1 h and then the bottle was removed from the cooling bath. After the solvent was removed under reduced pressure, the residue was purified by column chromatography on silica gel using hexane/ $\text{CH}_2\text{Cl}_2$  (1:1, V/V) as eluent. Yield of  $(\mu\text{-cpdt})\text{Fe}_2(\text{CO})_6$ : 35% (0.45 g). IR ( $\text{CH}_2\text{Cl}_2$ ):  $\nu(\text{CO})$  2076 (m), 2036 (s), 1997 (m), 1731 (w)  $\text{cm}^{-1}$ . MS (API-ESI in  $\text{CHCl}_3$ ):  $m/z$  426.3  $[\text{M}+\text{H}]^+$  (calcd. for  $\text{C}_{11}\text{H}_6\text{Fe}_2\text{O}_7\text{S}_2$ :  $m/z$  425.8).  $^1\text{H}$  NMR (400 MHz,  $\text{CDCl}_3$ ):  $\delta$  3.18 (s br, 2H),  $\delta$  2.06 (d br, 2H),  $\delta$  1.50 (d br, 2H).

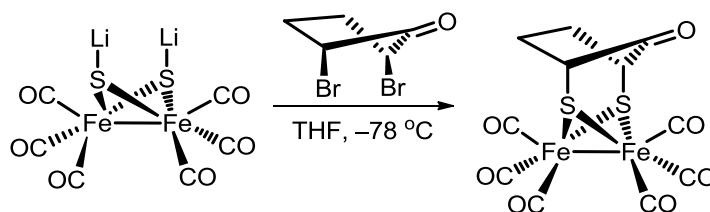

**Synthesis of **1** and **2**.** The solution of  $\text{PMe}_3$  (3.0 M, 1.3 mL, 4.0 mmol) in hexane was added to a toluene solution (20 mL) of  $(\mu\text{-cpdt})\text{Fe}_2(\text{CO})_6$  (0.43 g, 1.0 mmol) at room temperature. The mixture was refluxed for 8 h. After cooling to room temperature, the solvent was removed under reduced pressure. The residue was purified by column chromatography on silica gel with hexane/ $\text{CH}_2\text{Cl}_2$  (2:3, V/V) as eluent. Pure complexes **1** and **2** were obtained as red needle crystals by recrystallization of crude products in hexane/ $\text{CH}_2\text{Cl}_2$  (3:2, V/V), respectively.

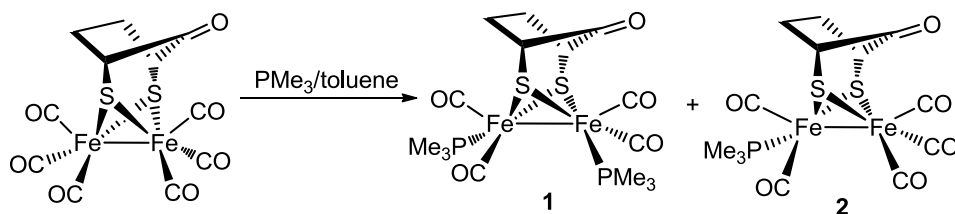

Yield of **1**: 37% (0.19 g). IR (CH<sub>2</sub>Cl<sub>2</sub>):  $\nu(\text{CO})$  1986 (m), 1958 (s), 1913 (m), 1718 (w) cm<sup>-1</sup>. <sup>1</sup>H NMR (400 MHz, CDCl<sub>3</sub>):  $\delta$  3.00 (s br, 2H), 1.90 (d br, 2H),  $\delta$  1.50–1.56 (m, 20H). <sup>31</sup>P NMR (400 MHz, CDCl<sub>3</sub>):  $\delta$  24.20, 27.78. Anal. calcd. for C<sub>15</sub>H<sub>24</sub>Fe<sub>2</sub>O<sub>5</sub>S<sub>2</sub>P<sub>2</sub>: C, 35.51%; H, 4.63%; Found: C, 35.40%; H, 4.59%.

Yield of **2**: 52% (0.25 g). IR (CH<sub>2</sub>Cl<sub>2</sub>):  $\nu(\text{CO})$  2043 (m), 1986 (s), 1967 (m), 1715 (w) cm<sup>-1</sup>. <sup>1</sup>H NMR (400 MHz, CDCl<sub>3</sub>):  $\delta$  3.11 (s br, 2H), 1.96 (d br, 2H),  $\delta$  1.50–1.55 (m, 11H). <sup>31</sup>P NMR (400 MHz, CDCl<sub>3</sub>):  $\delta$  25.17. Anal. calcd. for C<sub>13</sub>H<sub>15</sub>Fe<sub>2</sub>O<sub>6</sub>S<sub>2</sub>P: C, 32.94%; H, 3.19%; Found: C, 33.11%; H, 3.14%.

**Synthesis of [1(OH)]BAR<sup>F</sup><sub>4</sub>.** Ferricinium salt [Cp<sub>2</sub>Fe](BAR<sup>F</sup><sub>4</sub>) (Ar<sup>F</sup> = 3,5-C<sub>6</sub>H<sub>3</sub>(CF<sub>3</sub>)<sub>2</sub>) (420 mg, 0.4 mmol) and H<sub>2</sub>O (10  $\mu$ L) were added to the solution of **1** (100 mg, 0.2 mmol) in CH<sub>2</sub>Cl<sub>2</sub> (10 mL) under nitrogen. The solution changed immediately from red to dark green. After the mixture was stirred for 15 min, 90 mL of hexane was added. The suspension was stirred for 5 min and the green precipitate was filtered. The solid was washed with hexane (2  $\times$  10 mL) and dried under vacuum. Yield of [1(OH)]BAR<sup>F</sup><sub>4</sub>: 88% (0.25 g). The single crystal was obtained from a saturated solution of [1(OH)]BAR<sup>F</sup><sub>4</sub> in CH<sub>2</sub>Cl<sub>2</sub>/C<sub>6</sub>H<sub>14</sub> (1/4, V/V) at room temperature. IR (CH<sub>2</sub>Cl<sub>2</sub>):  $\nu(\text{CO})$  2053 (m), 2014 (s), 1959 (m) cm<sup>-1</sup>. <sup>31</sup>P NMR (400 MHz, CDCl<sub>3</sub>):  $\delta$  31.07, 11.54. API-ESI-MS (in CH<sub>2</sub>Cl<sub>2</sub>):  $m/z$  538.9282 [M–BAR<sup>F</sup><sub>4</sub>]<sup>+</sup> (calcd. for C<sub>15</sub>H<sub>25</sub>Fe<sub>2</sub>O<sub>6</sub>P<sub>2</sub>S<sub>2</sub>:  $m/z$  538.9267). <sup>1</sup>H NMR (400 MHz, CDCl<sub>3</sub>):  $\delta$  3.75 (s, 1H), 3.32 (s, 1H), 2.95 (s, 1H), 2.32 (s, 2H), 2.01 (s, 1H),  $\delta$  1.64–1.73 (2s, 18H).

### X-Ray structure determination of **1**, **2** and [1(OH)]BAR<sup>F</sup><sub>4</sub>

The single crystal X-ray diffraction data were collected with an Bruker Smart Apex II

CCD diffractometer with a graphite-monochromated Mo- $K_{\alpha}$  radiation ( $\lambda = 0.071073 \text{ \AA}$ ) at 298 K using the  $\omega$ - $2\theta$  scan mode. Data processing was accomplished with the SAINT processing program.<sup>S5</sup> Intensity data were corrected for absorption by the SADABS program.<sup>S6</sup> All structures were solved by direct methods and refined on  $F^2$  against full-matrix least-squares methods by using the SHELXTL 97 program package.<sup>S7</sup> All non-hydrogen atoms were refined anisotropically. Hydrogen atoms were located by geometrical calculation. Details of crystal data, data collections and structure refinements are summarized in Tables S1 and S2. CCDC-798238 (**1**), 798239 (**2**) and -926091 ( $[\mathbf{1}(\text{OH})]\text{BAr}_4^{\text{F}}$ ) contain the supplementary crystallographic data for this paper. These data can be obtained free of charge from The Cambridge Crystallographic Data Centre via [www.ccdc.cam.ac.uk/data\\_request/cif](http://www.ccdc.cam.ac.uk/data_request/cif).

**Table S1** Crystallographic data processing parameters for **1**, **2**, and **[1(OH)]BAr<sup>F</sup><sub>4</sub>**

| Complex                                                          | <b>[1]</b> <sub>2</sub>                                                                       | <b>2</b>                                                                       | <b>[1(OH)]BAr<sup>F</sup><sub>4</sub> CH<sub>2</sub>Cl<sub>2</sub></b>                                                        |
|------------------------------------------------------------------|-----------------------------------------------------------------------------------------------|--------------------------------------------------------------------------------|-------------------------------------------------------------------------------------------------------------------------------|
| Formula                                                          | C <sub>30</sub> H <sub>48</sub> Fe <sub>4</sub> O <sub>10</sub> P <sub>4</sub> S <sub>4</sub> | C <sub>13</sub> H <sub>15</sub> Fe <sub>2</sub> O <sub>6</sub> PS <sub>2</sub> | C <sub>48</sub> H <sub>39</sub> BCl <sub>2</sub> F <sub>24</sub> Fe <sub>2</sub> O <sub>6</sub> P <sub>2</sub> S <sub>2</sub> |
| <i>F</i> <sub>w</sub>                                            | 1044.20                                                                                       | 474.04                                                                         | 1487.26                                                                                                                       |
| Crystal system                                                   | triclinic                                                                                     | triclinic                                                                      | Monoclinic                                                                                                                    |
| Space group                                                      | P-1                                                                                           | P-1                                                                            | P2(1)/c                                                                                                                       |
| <i>a</i> (Å)                                                     | 10.158(4)                                                                                     | 8.9553(15)                                                                     | 12.6932(8)                                                                                                                    |
| <i>b</i> (Å)                                                     | 12.393(5)                                                                                     | 10.2137(16)                                                                    | 18.5417(14)                                                                                                                   |
| <i>c</i> (Å)                                                     | 17.576(6)                                                                                     | 11.056(3)                                                                      | 25.8275(18)                                                                                                                   |
| <i>α</i> (deg)                                                   | 92.450(6)                                                                                     | 105.403(3)                                                                     | 90.00                                                                                                                         |
| <i>β</i> (deg)                                                   | 92.727(6)                                                                                     | 93.507(3)                                                                      | 91.440(4)                                                                                                                     |
| <i>γ</i> (deg)                                                   | 95.945(6)                                                                                     | 112.215(2)                                                                     | 90.00                                                                                                                         |
| <i>V</i> (Å <sup>3</sup> )                                       | 2195.7(14)                                                                                    | 887.6(3)                                                                       | 6076.7(7)                                                                                                                     |
| <i>Z</i>                                                         | 2                                                                                             | 4                                                                              | 4                                                                                                                             |
| <i>D</i> <sub>calcd</sub> (g cm <sup>-3</sup> )                  | 1.579                                                                                         | 1.774                                                                          | 1.626                                                                                                                         |
| Crystal size (mm)                                                | 0.3/ 0.3 / 0.2                                                                                | 0.32/ 0.29 / 0.2                                                               | 0.25/ 0.18 / 0.12                                                                                                             |
| <i>μ</i> (mm <sup>-1</sup> )                                     | 1.697                                                                                         | 1.985                                                                          | 0.805                                                                                                                         |
| <i>θ</i> Range (deg)                                             | 2.02 / 24.69                                                                                  | 1.94 / 25.0                                                                    | 2.08 / 25.0                                                                                                                   |
| Reflns collected                                                 | 10766                                                                                         | 3080                                                                           | 23223                                                                                                                         |
| Independent reflns                                               | 7730                                                                                          | 3028                                                                           | 10260                                                                                                                         |
| Parameters refined                                               | 469                                                                                           | 217                                                                            | 788                                                                                                                           |
| <i>F</i> (000)                                                   | 1072                                                                                          | 480                                                                            | 2976                                                                                                                          |
| GOF on <i>F</i> <sup>2</sup>                                     | 0.96                                                                                          | 1.011                                                                          | 1.087                                                                                                                         |
| <i>R</i> <sub>int</sub>                                          | 0.049                                                                                         | 0.0250                                                                         | 0.0677                                                                                                                        |
| <i>R</i> <sub>1</sub> [ <i>I</i> > 2σ( <i>I</i> )] <sup>a</sup>  | 0.0686                                                                                        | 0.0390                                                                         | 0.0935                                                                                                                        |
| <i>wR</i> <sub>2</sub> [ <i>I</i> > 2σ( <i>I</i> )] <sup>b</sup> | 0.1733                                                                                        | 0.1078                                                                         | 0.2370                                                                                                                        |
| Residual electron density (e Å <sup>-3</sup> )                   | 0.899 / 0.459                                                                                 | 1.125 / 0.629                                                                  | 0.918 / 0.737                                                                                                                 |

<sup>a</sup>  $R_1 = \sum ||F_o| - |F_c||$ . <sup>b</sup>  $wR_2 = [\sum [w(F_o^2 - F_c^2)^2] / \sum w(F_o^2)^2]^{1/2}$ .

**Table S2** Selected bond lengths (Å) and angles (°) for **1**, **2**, and **[1(OH)]BAr<sup>F</sup><sub>4</sub>**

| Complex         | <b>1</b>   | <b>2</b>   | <b>[1(OH)]BAr<sup>F</sup><sub>4</sub></b> |
|-----------------|------------|------------|-------------------------------------------|
| Bond lengths    |            |            |                                           |
| Fe1–Fe2         | 2.5748(18) | 2.5369(7)  | 2.6202(18)                                |
| Fe1–S1          | 2.252 (3)  | 2.2438(11) | 2.216(2)                                  |
| Fe1–S2          | 2.251 (3)  | 2.2552(10) | 2.194(2)                                  |
| Fe2–S1          | 2.260 (3)  | 2.2688(10) | 2.292(2)                                  |
| Fe2–S2          | 2.264 (3)  | 2.2678(9)  | 2.333(2)                                  |
| Fe1–P1          | 2.237 (3)  | 2.2300(10) | 2.272(3)                                  |
| Fe2–P2          | 2.225 (3)  | –          | 2.264(2)                                  |
| Fe1–C6          | 1.784 (10) | 1.770(4)   | 1.760(12)                                 |
| Fe1–C7          | 1.759 (10) | 1.770(4)   | 1.804(11)                                 |
| Fe1–C9          | –          | –          | 2.609                                     |
| Fe2–C8          | 1.755(10)  | 1.189(4)   | 1.828(10)                                 |
| Fe2–C9          | 1.734(10)  | 1.797(4)   | 1.769(10)                                 |
| Fe2–O1          | 3.717      | 3.715      | 1.928(5)                                  |
| S...S           | 3.019      | 3.3035     | 3.114                                     |
| O1...O8         | 3.023      | 3.027      | 3.530                                     |
| Bond angles     |            |            |                                           |
| S1–Fe1–S2       | 84.02(9)   | 84.85(3)   | 89.83(9)                                  |
| Fe1–S1–Fe2      | 69.60(8)   | 68.41(3)   | 71.05(7)                                  |
| S1–Fe2–O1       | –          | –          | 85.31(18)                                 |
| S2–Fe2–O1       | –          | –          | 84.39(16)                                 |
| Fe1–C9–Fe2      | –          | –          | 70.6                                      |
| S1–Fe2–C8       | 104.4(3)   | –          | 171.0(2)                                  |
| S2–Fe2–C8       | 108.2(3)   | –          | 87.1(2)                                   |
| S1–Fe2–C9       | 90.3(3)    | –          | 95.7(3)                                   |
| Torsional angle |            |            |                                           |
| C6–Fe1–Fe2–C8   | 34.1       | 28.3       | 0                                         |
| S1–Fe1–Fe2–S2   | 108.4      | 107.5      | 115.7                                     |

## Electrochemistry studies of **1** and [1(OH)]BAr<sup>F</sup><sub>4</sub>

Cyclic voltammograms were carried out in a three-electrode cell under Ar using CHI 630D electrochemical work station. The working electrode was a glassy carbon disc (diameter 3 mm) polished with 3 and 1  $\mu\text{m}$  diamond pastes and sonicated in ion-free water for 15 min prior to use. The reference electrode was a non-aqueous  $\text{Ag}^+/\text{Ag}$  (0.01 M  $\text{AgNO}_3$  in  $\text{CH}_3\text{CN}$ ) electrode and the counter electrode was platinum wire. A solution of 0.1 M  $n\text{Bu}_4\text{NPF}_6$  (Fluka, electrochemical grade) in  $\text{CH}_2\text{Cl}_2$  was used as supporting electrolyte, which was degassed by bubbling with dry argon for 10 min before measurement. The ferricinium/ferrocene ( $\text{Fc}^+/\text{Fc}$ ) couple was used as an internal reference and all potentials given in this work are referred to the  $\text{Fc}^{+/0}$  potential.

## Chemical reduction of [1(OH)]BAr<sup>F</sup><sub>4</sub>

The process of chemical reduction of [1(OH)]BAr<sup>F</sup><sub>4</sub> was monitored by in situ IR spectroscopy using a Mettler-Toledo ReactIR<sup>TM</sup> 15 System equipped with an MCT detector and a DsubAgXSiComp<sup>TM</sup> in situ probe. Two equiv. of  $\text{Cp}_2\text{Co}$  was added to the solution of [1(OH)]BAr<sup>F</sup><sub>4</sub> (14 mg, 0.01 mmol), which was in situ generated in  $\text{CH}_2\text{Cl}_2$  (2 mL). All typical  $\nu(\text{CO})$  absorptions of [1(OH)]BAr<sup>F</sup><sub>4</sub> disappeared within 15 min and in the meantime, the  $\nu(\text{CO})$  bands of **1** almost completely recovered in the IR spectra (Fig. S4<sup>†</sup>).

## References

S1 M. Boelens, N. De Kimpe, M. Keppens and J.-P. Declercq, *J. Org. Chem.*, 1994, **59**, 4170–4171.

S2 P. A. Eldredge, K. S. Bos, D. E. Barber, R. F. Bryan, E. Sinn, A. Rheingold and B. A. Averill, *Inorg. Chem.*, 1991, **30**, 2365–2375.

S3 M. Brookhart, B. Grant and Jr. A. F. Volpe, *Organometallics*, 1992, **11**, 3920–3922.

S4 J. L. Bras, H. Jiao, W. E. Meyer, F. Hampel and J. A. Gladysz, *J. Organomet. Chem.*, 2000,

**616**, 54–66

S5 G. M. Sheldrick, *SHELXTL97 Program for the Refinement of Crystal Structure*, University of Göttingen, Germany, 1997.

S6 *Software packages SMART and SAINT*, Siemens Energy & Automation Inc., Madison, Wisconsin, 1996.

S7 G. M. Sheldrick, *SADABS Absorption Correction Program*, University of Göttingen, Germany, 1996.



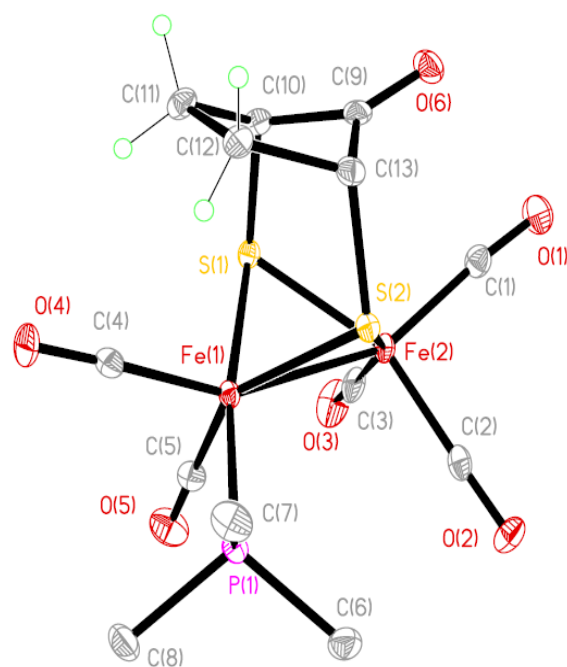

**Fig. S1** ORTEP drawing of **2** with thermal ellipsoids at the 30% probability level. Hydrogen atoms have been omitted for clarity except the hydrogen atoms at the C(11) and C(12).

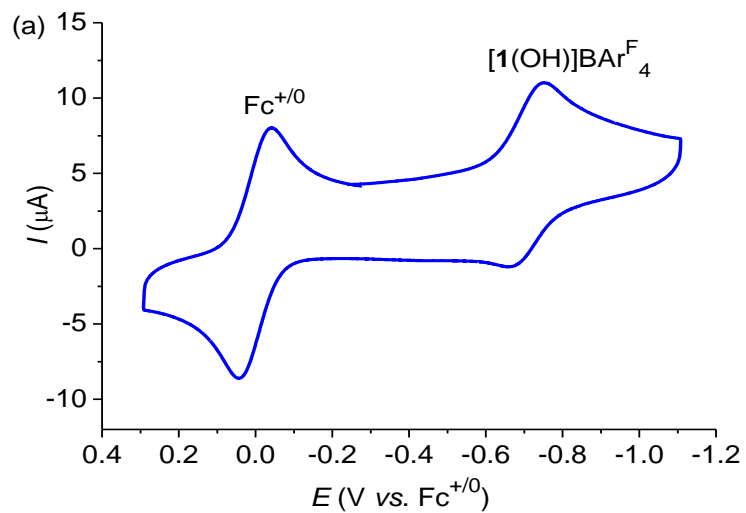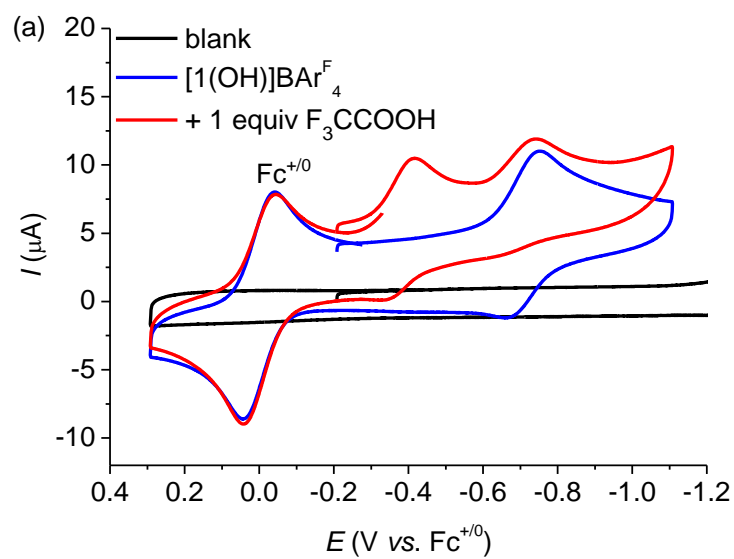

**Fig. S2** Cyclic voltammograms of (a)  $[1(\text{OH})]\text{BARF}_4$  (1.0 mM) in  $\text{CH}_2\text{Cl}_2$  and (b)  $[1(\text{OH})]\text{BARF}_4$  + 1 equiv. of  $\text{CF}_3\text{COOH}$  in the presence of ferrocene as an internal standard, with 0.1 M  $n\text{Bu}_4\text{NPF}_6$  as electrolyte, scan rate  $100 \text{ mV s}^{-1}$ .

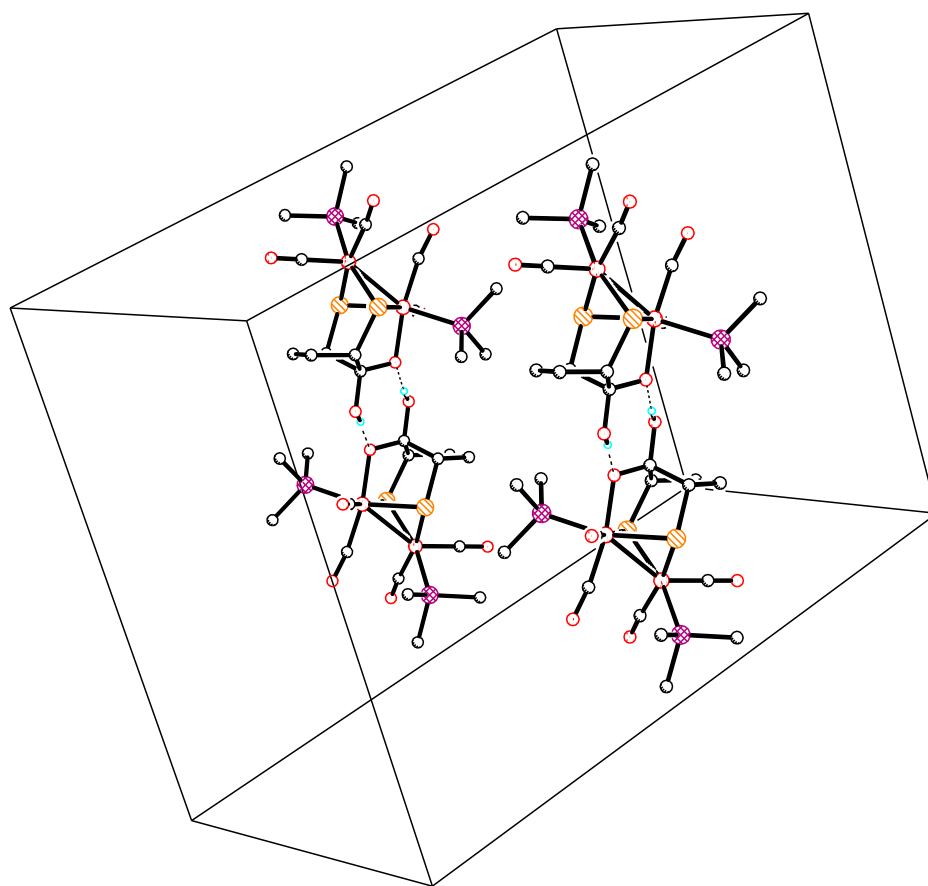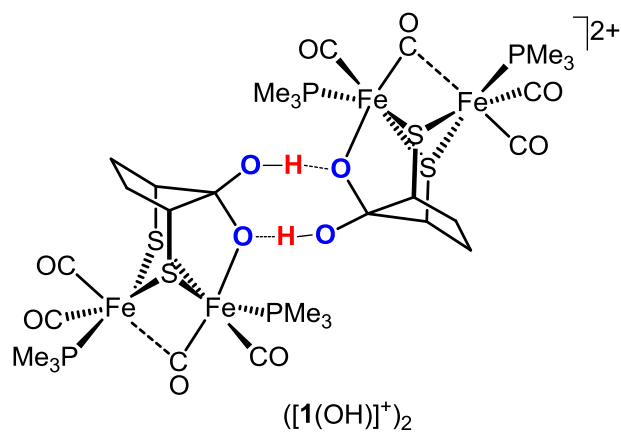

**Fig. S3** A view of the O–H  $\cdots$  O bonds between two molecules of  $[1(\text{OH})]^+$ . The structure is represented as standard ball and stick mode (O, red, small ball; H, sky-blue; C, grey; P, purple; S, yellow; Fe, red). Hydrogen atoms not involving in H-bond are omitted for clarity.

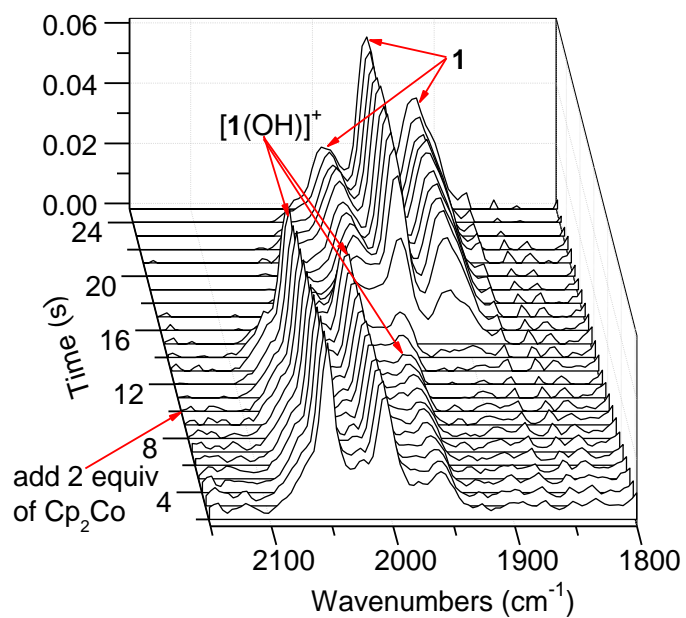

**Fig. S4** Sample-stacked IR spectra for the reduction of the in situ generated  $[1(\text{OH})]\text{BAR}_4^{\text{F}}$  (5 mM in  $\text{CH}_2\text{Cl}_2$ ) by 2 equiv. of  $\text{Cp}_2\text{Co}$ .
